# Supplementary material for: Identification of Phytochemicals in Bioactive Extracts of Acacia saligna Growing in Australia
Source: MDPI journal article supplement (doi:10.3390/molecules28031028), 2023-01-19
Supplement: s1 [file s1]

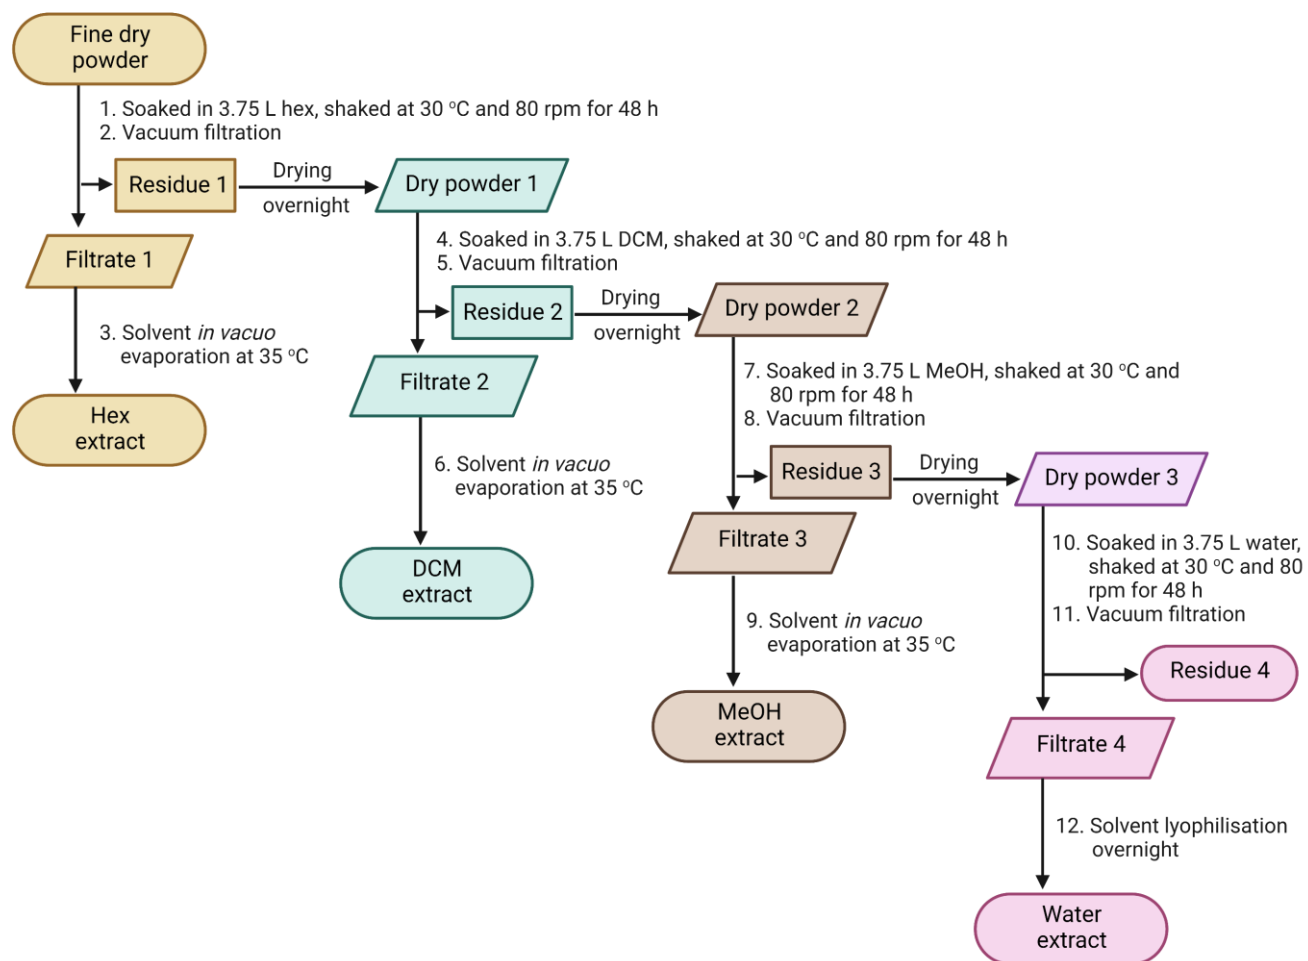

**Figure S1.** Illustration of the sequential extraction of *A. saligna*'s plant parts (Note: Hex = hexane, DCM= dichloromethane, MeOH = methanol)

**Table S1.** DPPH scavenging activity of the extracts of *A. saligna*

| No | Extract             | DPPH scavenging percentage (%) at the indicated concentration (µg/mL) |              |               |              |              |              |              |              |              |               | IC <sub>50</sub> (µg/mL) |
|----|---------------------|-----------------------------------------------------------------------|--------------|---------------|--------------|--------------|--------------|--------------|--------------|--------------|---------------|--------------------------|
|    |                     | 7.8125                                                                | 15.625       | 31.25         | 62.5         | 125          | 250          | 500          | 1,000        | 2,000        | 4,000         |                          |
| 1  | FL-hex              | -                                                                     | -            | 6.306 ± 3.09  | 7.537 ± 2.97 | 12.19 ± 4.03 | 10.47 ± 4.30 | 11.07 ± 4.56 | 11.5 ± 6.78  | 13.64 ± 6.44 | 19.1 ± 6.40   | >4000 <sup>a</sup>       |
| 2  | FL-DCM              | -                                                                     | -            | 0.645 ± 6.16  | 3.976 ± 6.61 | 2.068 ± 7.92 | 3.639 ± 9.03 | 8.673 ± 6.85 | 15.91 ± 5.14 | 14.36 ± 5.94 | 22.87 ± 3.57  | >4000 <sup>a</sup>       |
| 3  | FL-MeOH             | 8.67 ± 5.44                                                           | 8.05 ± 4.06  | 9.32 ± 1.461  | 16.48 ± 0.91 | 27.8 ± 0.03  | 41.57 ± 1.3  | 61.07 ± 1.30 | 74.34 ± 0.87 | -            | -             | 331.5 ± 17.21****        |
| 4  | FL-H <sub>2</sub> O | -                                                                     | -            | 1.07 ± 2.96   | 2.54 ± 2.95  | 4.32 ± 3.34  | 5.45 ± 4.09  | 10.51 ± 2.65 | 18.09 ± 3.42 | 20.92 ± 2.11 | 34.78 ± 5.75  | >4000 <sup>a</sup>       |
| 5  | LF-hex              | -                                                                     | -            | 10.04 ± 10.46 | 12.43 ± 8.05 | 18.1 ± 5.99  | 18.82 ± 3.36 | 18.96 ± 8.98 | 22.26 ± 7.29 | 34.45 ± 9.91 | 60.47 ± 11.55 | 3,283 ± 774.3****        |
| 6  | LF-DCM              | -                                                                     | -            | 1.391 ± 10.24 | 4.17 ± 15.54 | 3.49 ± 9.81  | 5.7 ± 8.78   | 14.81 ± 7.81 | 27.72 ± 7.85 | 24.3 ± 7.28  | 37.41 ± 7.09  | >4000 <sup>a</sup>       |
| 7  | LF-MeOH             | 10.75 ± 6.58                                                          | 13.33 ± 7.44 | 21.33 ± 7.21  | 25.89 ± 7.56 | 38.66 ± 8.94 | 58.2 ± 9.95  | 82.6 ± 6.20  | 89.33 ± 0.61 | -            | -             | 190.1 ± 59.15****        |
| 8  | LF-H <sub>2</sub> O | -                                                                     | -            | 3.61 ± 2.90   | 5.06 ± 3.31  | 7.55 ± 4.40  | 8.12 ± 6.56  | 14.03 ± 7.4  | 26.06 ± 5.18 | 31.14 ± 5.65 | 47.9 ± 5.08   | >4000 <sup>a</sup>       |
| 9  | BK-hex              | -                                                                     | -            | 2.27 ± 7.00   | 5.57 ± 6.03  | 12.39 ± 2.51 | 10.06 ± 3.23 | 9.764 ± 4.26 | 11.4 ± 4.02  | 15.11 ± 5.61 | 26.8 ± 5.72   | >4000 <sup>a</sup>       |
| 10 | BK-DCM              | -                                                                     | -            | 1.793 ± 5.00  | 1.497 ± 5.40 | 2.304 ± 5.96 | 6.771 ± 6.70 | 14.09 ± 5.68 | 26.35 ± 6.87 | 30.49 ± 5.64 | 49.32 ± 8.42  | >4000 <sup>a</sup>       |
| 11 | BK-MeOH             | 10.29 ± 5.22                                                          | 16.13 ± 3.92 | 26.42 ± 2.99  | 37.79 ± 4.60 | 56.85 ± 7.27 | 81.14 ± 6.06 | 88.55 ± 0.81 | 89.97 ± 0.53 | -            | -             | 94.24 ± 19.89            |
| 12 | BK-H <sub>2</sub> O | -                                                                     | -            | 3.256 ± 4.36  | 5.436 ± 4.93 | 7.886 ± 6.37 | 11.27 ± 5.48 | 19.53 ± 5.53 | 32.34 ± 6.68 | 42.35 ± 7.06 | 71.69 ± 8.54  | 2,446 ± 527.4****        |

<sup>a</sup>The activity did not reach 50% at the highest tested concentration (4000 µg /ml), \*\*\*\**p* < 0.0001 of samples against vitamin C (*n* = 3, ANOVA).

**Table S2.** Scavenging activity (%) and IC<sub>50</sub> values of vitamin C from DPPH scavenging assay

| No | Sample    | DPPH scavenging percentage (%) at the indicated concentration (µg/mL) |              |             |              |              |              |              | IC <sub>50</sub> (µg/mL) |
|----|-----------|-----------------------------------------------------------------------|--------------|-------------|--------------|--------------|--------------|--------------|--------------------------|
|    |           | 1.56                                                                  | 3.125        | 6.25        | 12.5         | 25           | 50           | 100          |                          |
| 1  | Vitamin C | 1.10 ± 3.90                                                           | 3.616 ± 2.89 | 5.15 ± 3.26 | 11.91 ± 4.52 | 24.59 ± 4.79 | 51.57 ± 9.65 | 86.88 ± 5.38 | 49.97 ± 10.76****        |

\*\*\*\**p* < 0.0001 was obtained from the comparison between vitamin C and FL-MeOH extract

**Table S3.** ABTS<sup>•+</sup> scavenging activity of the extracts of *A. saligna*

| No | Sample              | ABTS scavenging percentage (%) at the indicated concentration (µg/mL) |              |               |               |               |               |               |               |              |              | IC <sub>50</sub> (µg/mL) |
|----|---------------------|-----------------------------------------------------------------------|--------------|---------------|---------------|---------------|---------------|---------------|---------------|--------------|--------------|--------------------------|
|    |                     | 7.8125                                                                | 15.625       | 31.25         | 62.5          | 125           | 250           | 500           | 1000          | 2000         | 4000         |                          |
| 1  | FL-hex              | -                                                                     | -            | 3.576 ± 7.18  | 4.182 ± 6.08  | 4.969 ± 6.37  | 5.11 ± 8.65   | 8.021 ± 7.32  | 11.48 ± 3.99  | 18.64 ± 7.78 | 30.49 ± 4.99 | >4000 <sup>a</sup>       |
| 2  | FL-DCM              | -                                                                     | -            | 2.534 ± 6.72  | 5.685 ± 6.17  | 10.12 ± 8.06  | 21.08 ± 6.79  | 29.53 ± 6.95  | 41.58 ± 6.71  | 54.65 ± 1.00 | 69.16 ± 0.85 | 1,579 ± 240.8****        |
| 3  | FL-MeOH             | 7.884 ± 3.18                                                          | 9.104 ± 2.21 | 12.09 ± 2.4   | 17.22 ± 1.371 | 27.71 ± 0.791 | 45.09 ± 0.597 | 62.72 ± 0.335 | 89.97 ± 2.278 | -            | -            | 316.6 ± 11.45****        |
| 4  | FL-H <sub>2</sub> O | -                                                                     | -            | 2.719 ± 4.60  | 4.937 ± 5.69  | 6.898 ± 3.36  | 11.08 ± 3.37  | 18.01 ± 4.12  | 28.77 ± 3.38  | 43.6 ± 0.22  | 70.28 ± 5.39 | 2,433 ± 103.5****        |
| 5  | LF-hex              | -                                                                     | -            | -1.047 ± 1.45 | 2.395 ± 0.20  | 8.864 ± 0.42  | 7.013 ± 1.67  | 13.06 ± 1.39  | 23.57 ± 0.98  | 35.42 ± 1.41 | 65.73 ± 0.32 | 2,951 ± 75.9****         |
| 6  | LF-DCM              | -                                                                     | -            | 3.193 ± 0.97  | 7.741 ± 3.71  | 12.18 ± 0.69  | 14.69 ± 0.60  | 23.84 ± 1.63  | 37.31 ± 0.13  | 56.49 ± 0.78 | 84.04 ± 0.18 | 1,633 ± 41.55****        |
| 7  | LF-MeOH             | 9.964 ± 1.74                                                          | 14.58 ± 0.85 | 20.71 ± 0.83  | 27.21 ± 0.03  | 43.98 ± 0.02  | 72.22 ± 0.55  | 99.63 ± 0.05  | 99.89 ± 0.05  | -            | -            | 146.7 ± 0.99             |
| 8  | LF-H <sub>2</sub> O | -                                                                     | -            | 5.21 ± 0.17   | 6.959 ± 2.68  | 8.885 ± 1.94  | 18.07 ± 4.66  | 22.23 ± 6.35  | 31.56 ± 6.61  | 44.34 ± 0.39 | 71 ± 1.16    | 2,422 ± 148.8****        |
| 9  | BK-hex              | -                                                                     | -            | 0.611 ± 1.77  | 1.13 ± 0.077  | 0.039 ± 0.64  | 3.449 ± 0.55  | 3.463 ± 2.23  | 9.726 ± 0.99  | 14.92 ± 3.10 | 30.56 ± 0.50 | >4000 <sup>a</sup>       |
| 10 | BK-DCM              | -                                                                     | -            | -3.323 ± 0.28 | -2.756 ± 3.54 | 4.297 ± 1.63  | 13.23 ± 1.25  | 22.49 ± 0.33  | 30.96 ± 2.62  | 42.35 ± 1.82 | 62.81 ± 3.04 | 2,764 ± 165.3****        |
| 11 | BK-MeOH             | 10.23 ± 6.29                                                          | 16.81 ± 6.19 | 31.91 ± 5.20  | 52.46 ± 1.65  | 80.41 ± 7.44  | 96.87 ± 0.45  | 92.53 ± 3.37  | 99.87 ± 0.01  | -            | -            | 55.44 ± 6.84             |
| 12 | BK-H <sub>2</sub> O | -                                                                     | -            | -1.072 ± 6.05 | 3.195 ± 8.07  | 5.123 ± 3.34  | 11.29 ± 5.27  | 22.59 ± 4.59  | 40.95 ± 4.10  | 69.81 ± 1.83 | 93.68 ± 2.52 | 1,241 ± 97.93****        |

<sup>a</sup>The activity did not reach 50% at the highest tested concentration (4000 µg /mL), \*\*\*\**p* = 0.0001 against vitamin C (*n* = 3, ANOVA).

**Table S4.** ABTS<sup>•+</sup> scavenging activity (%) and IC<sub>50</sub> values of vitamin C

| No | Sample    | ABTS scavenging percentage (%) at the indicated concentration (µg/mL) |              |              |              |              |              |              | IC <sub>50</sub> (µg/mL) |
|----|-----------|-----------------------------------------------------------------------|--------------|--------------|--------------|--------------|--------------|--------------|--------------------------|
|    |           | 1.56                                                                  | 3.125        | 6.25         | 12.5         | 25           | 50           | 100          |                          |
| 1  | Vitamin C | 2.387 ± 5.29                                                          | 1.026 ± 4.74 | 3.058 ± 5.04 | 6.223 ± 6.18 | 17.29 ± 3.44 | 31.21 ± 4.53 | 73.56 ± 2.64 | 72.25 ± 4.42****         |

\*\*\*\**p* < 0.0001 was summarised between vitamin C & FL-MeOH

**Table S5a.** Percentage of  $\alpha$ -glucosidase inhibition (%) of flowers extracts

| No | Extract             | Percentage of inhibition (%) at the indicated concentration ( $\mu\text{g/mL}$ ) |                      |                      |                      |                      |                      | IC <sub>50</sub><br>( $\mu\text{g/mL}$ ) |
|----|---------------------|----------------------------------------------------------------------------------|----------------------|----------------------|----------------------|----------------------|----------------------|------------------------------------------|
|    |                     | 3.125                                                                            | 6.25                 | 12.5                 | 25                   | 50                   | 100                  |                                          |
| 1  | FL-hex              | -2.523 $\pm$<br>4.02                                                             | -3.158 $\pm$<br>4.96 | 1.291 $\pm$<br>0.72  | 2.861 $\pm$<br>2.15  | 4.050 $\pm$<br>1.79  | 4.652 $\pm$<br>2.35  | >100 <sup>a</sup>                        |
| 2  | FL-DCM              | -1.785 $\pm$<br>2.53                                                             | -1.682 $\pm$<br>2.22 | 0.339 $\pm$<br>2.86  | 0.845 $\pm$<br>3.09  | 0.277 $\pm$<br>1.89  | 1.875 $\pm$ 5.5      | >100 <sup>a</sup>                        |
| 3  | FL-H <sub>2</sub> O | -1.323 $\pm$<br>2.81                                                             | -2.124 $\pm$<br>3.21 | -3.898 $\pm$<br>4.64 | -2.675 $\pm$<br>5.69 | -4.222 $\pm$<br>6.54 | -4.312 $\pm$<br>6.65 | >100 <sup>a</sup>                        |

<sup>a</sup>The activity did not reach 50% at the highest tested concentration (100  $\mu\text{g/mL}$ ).

**Table S5b.** Percentage of  $\alpha$ -glucosidase inhibition (%) of methanolic flowers extract

| No | Extract | Percentage of inhibition (%) at the indicated concentration ( $\mu\text{g/mL}$ ) |                     |                      |                     |                     |                     | IC <sub>50</sub><br>( $\mu\text{g/mL}$ ) |
|----|---------|----------------------------------------------------------------------------------|---------------------|----------------------|---------------------|---------------------|---------------------|------------------------------------------|
|    |         | 25                                                                               | 30                  | 40                   | 50                  | 60                  | 80                  |                                          |
| 1  | FL-MeOH | 20.04 $\pm$<br>2.45                                                              | 36.39 $\pm$<br>3.26 | 62.55 $\pm$<br>10.26 | 83.47 $\pm$<br>0.86 | 85.59 $\pm$<br>0.48 | 87.93 $\pm$<br>0.43 | 34.93 $\pm$<br>2.67 <sup>***</sup>       |

<sup>\*\*\*</sup> $p = 0.0004$  was from the inhibition of the extract *vs* acarbose ( $n = 3$ , ANOVA).

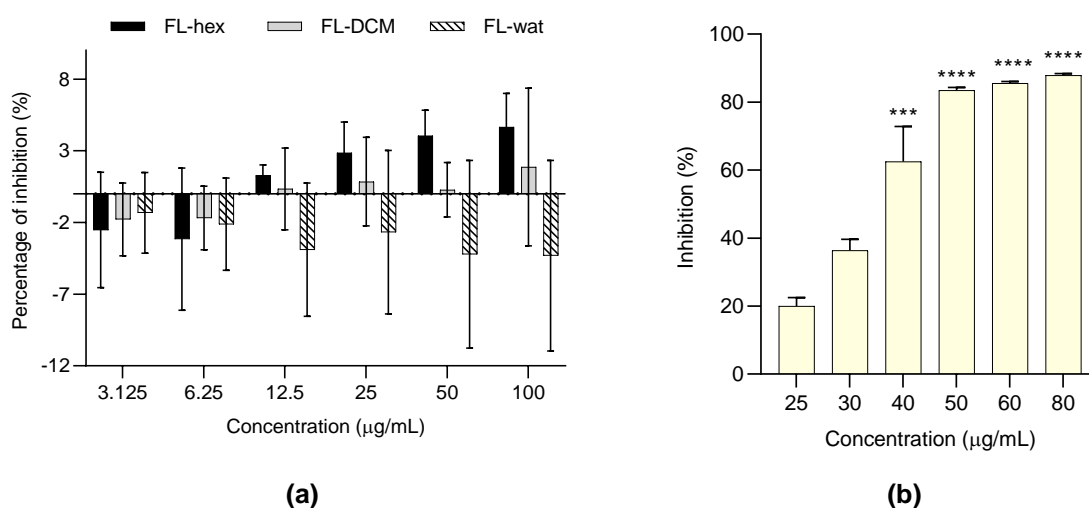

**Figure S2.** Bar charts representing the dose-response relationship between the concentration of FL-hex, -DCM, and -wat extracts (a); FL-MeOH (b) and inhibitory  $\alpha$ -glucosidase percentage (<sup>\*\*\*</sup> $p = 0.0003$ ; <sup>\*\*\*\*</sup> $p < 0.0001$  against inhibition at 25  $\mu\text{g/mL}$ ,  $n = 3$ , ANOVA)

**Table S6a.** Percentage of  $\alpha$ -glucosidase inhibition (%) of leaves extracts

| No | Extract             | Percentage of inhibition (%) at the indicated concentration ( $\mu\text{g/mL}$ ) |                      |                      |                      |                       |                      | IC <sub>50</sub><br>( $\mu\text{g/mL}$ ) |
|----|---------------------|----------------------------------------------------------------------------------|----------------------|----------------------|----------------------|-----------------------|----------------------|------------------------------------------|
|    |                     | 31.25                                                                            | 62.5                 | 125                  | 250                  | 500                   | 1000                 |                                          |
| 1  | LF-hex              | -0.727 $\pm$<br>3.28                                                             | -0.581 $\pm$<br>3.69 | 17.89 $\pm$<br>7.03  | 31.74 $\pm$<br>16.58 | 50.91 $\pm$<br>15.02  | 67.31 $\pm$<br>11.81 | 285.5 $\pm$<br>100.9                     |
| 2  | LF-DCM              | -2.421 $\pm$<br>6.73                                                             | 0.188 $\pm$<br>5.83  | -2.172 $\pm$<br>5.67 | -342.1 $\pm$<br>335  | -340.6 $\pm$<br>335.1 | -8.070 $\pm$<br>4.38 | >1000 <sup>a</sup>                       |
| 3  | LF-H <sub>2</sub> O | -8.004 $\pm$<br>8.82                                                             | -6.791 $\pm$<br>8.11 | -5.323 $\pm$<br>7.40 | -0.630 $\pm$<br>4.68 | 22.97 $\pm$<br>2.10   | 58.34 $\pm$<br>3.61  | 882.6 $\pm$<br>48.01                     |

<sup>a</sup>The activity did not reach 50% at the highest tested concentration (1000  $\mu\text{g/mL}$ ), ANOVA,  $n = 3$ .

**Table S6b.** Percentage of  $\alpha$ -glucosidase inhibition (%) of methanolic leaves extract

| No | Extract | Percentage of inhibition (%) at the indicated concentration ( $\mu\text{g/mL}$ ) |                     |                     |                     |                     |                     | IC <sub>50</sub><br>( $\mu\text{g/mL}$ ) |
|----|---------|----------------------------------------------------------------------------------|---------------------|---------------------|---------------------|---------------------|---------------------|------------------------------------------|
|    |         | 25                                                                               | 30                  | 40                  | 50                  | 60                  | 80                  |                                          |
| 1  | LF-MeOH | 15.23 $\pm$<br>2.68                                                              | 28.86 $\pm$<br>1.33 | 50.30 $\pm$<br>2.33 | 80.31 $\pm$<br>0.89 | 84.85 $\pm$<br>0.95 | 86.79 $\pm$<br>0.77 | 38.69 $\pm$<br>1.01 <sup>***</sup>       |

<sup>\*\*\*</sup> $p = 0.0004$  was from the inhibition of the extract *vs* acarbose ( $n = 3$ , ANOVA).

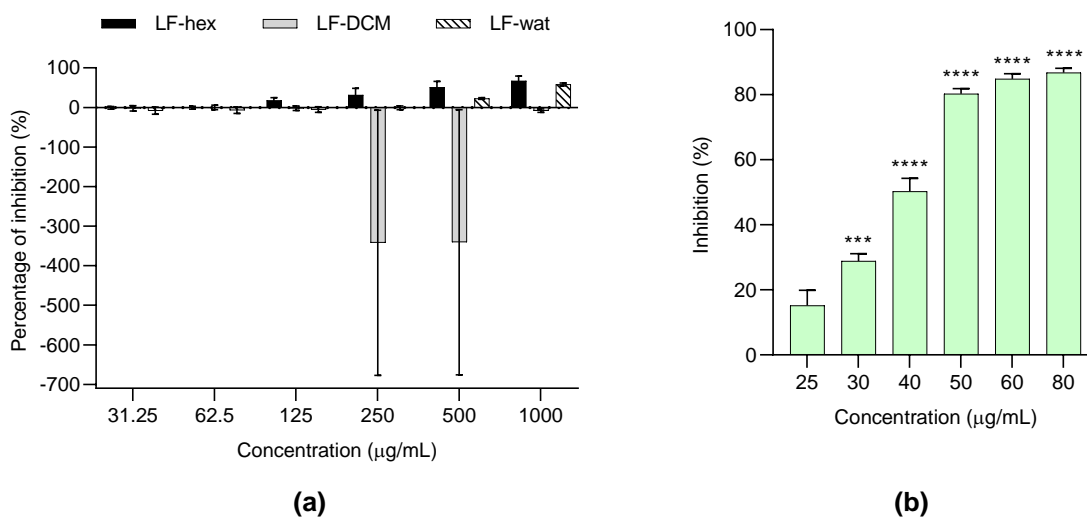

**Figure S3.** Bar charts representing the dose-response relationship between the concentration of LF-hex, -DCM, and -H<sub>2</sub>O extracts **(a)**; LF-MeOH **(b)** and inhibitory  $\alpha$ -glucosidase percentage (<sup>\*\*\*</sup> $p = 0.001$ ; <sup>\*\*\*\*</sup> $p < 0.0001$  against inhibition at 25  $\mu\text{g/mL}$ ,  $n = 3$ , ANOVA)

**Table S7a.** Percentage of  $\alpha$ -glucosidase inhibition (%) of barks extracts

| No | Extract             | Percentage of inhibition (%) at the indicated concentration ( $\mu\text{g/mL}$ ) |                   |                  |                   |                   |                   | IC <sub>50</sub> ( $\mu\text{g/mL}$ ) |
|----|---------------------|----------------------------------------------------------------------------------|-------------------|------------------|-------------------|-------------------|-------------------|---------------------------------------|
|    |                     | 31.25                                                                            | 62.5              | 125              | 250               | 500               | 1000              |                                       |
| 1  | BK-hex              | 1.114 $\pm$ 1.43                                                                 | 14.27 $\pm$ 6.99  | 17.77 $\pm$ 4.19 | 42.19 $\pm$ 5.31  | 77.07 $\pm$ 1.55  | 85.22 $\pm$ 2.05  | 289.9 $\pm$ 29.17                     |
| 2  | BK-DCM              | -1.116 $\pm$ 2.49                                                                | -3.464 $\pm$ 1.02 | 4.055 $\pm$ 3.39 | 30.78 $\pm$ 13.83 | 53.23 $\pm$ 13.84 | 44.14 $\pm$ 16.84 | >1000 <sup>a</sup>                    |
| 3  | BK-H <sub>2</sub> O | -4.953 $\pm$ 3.53                                                                | 9.056 $\pm$ 3.14  | 22.09 $\pm$ 6.16 | 56.44 $\pm$ 7.51  | 79.68 $\pm$ 3.94  | 86.34 $\pm$ 0.09  | 23.27 $\pm$ 3.88****                  |

<sup>a</sup>The activity did not reach 50% at the highest tested concentration (1000  $\mu\text{g/mL}$ ); \*\*\*\* $p$  = 0.0001 was from the IC<sub>50</sub> of BK-H<sub>2</sub>O *vs* acarbose ( $n$  = 3, ANOVA).

**Table S7b.** Percentage of  $\alpha$ -glucosidase inhibition (%) of methanolic barks extract

| No | Extract | Percentage of inhibition (%) at the indicated concentration ( $\mu\text{g/mL}$ ) |                  |                  |                  |                  |                  | IC <sub>50</sub> ( $\mu\text{g/mL}$ ) |
|----|---------|----------------------------------------------------------------------------------|------------------|------------------|------------------|------------------|------------------|---------------------------------------|
|    |         | 3                                                                                | 4                | 5                | 6                | 8                | 10               |                                       |
| 1  | BK-MeOH | 29.20 $\pm$ 4.85                                                                 | 40.10 $\pm$ 2.72 | 57.28 $\pm$ 7.44 | 75.46 $\pm$ 2.15 | 84.45 $\pm$ 0.17 | 85.35 $\pm$ 0.25 | 4.373 $\pm$ 0.24****                  |

\*\*\*\* $p$  < 0.0001 was from the IC<sub>50</sub> of BK-MeOH *vs* acarbose ( $n$  = 3, ANOVA).

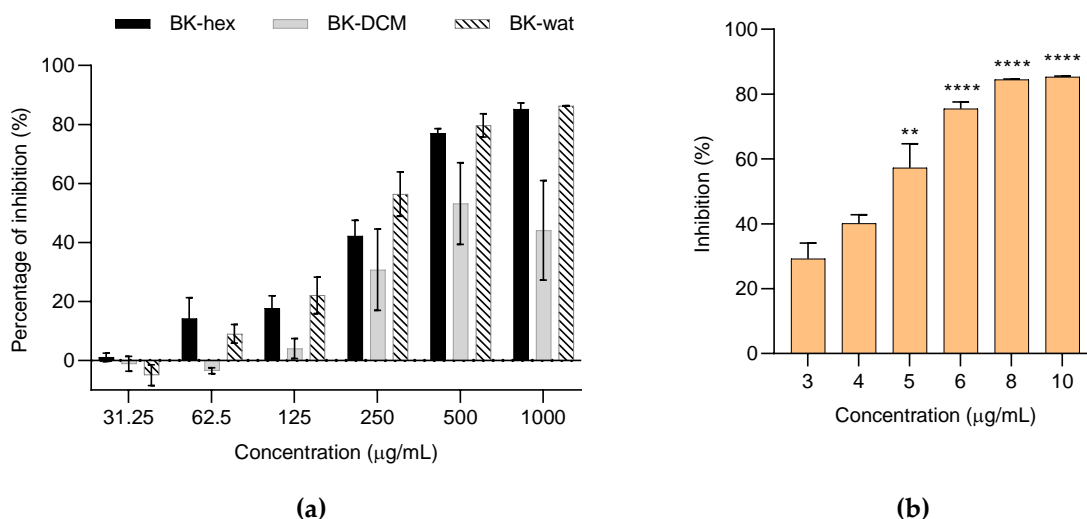

**Figure S4.** Bar charts representing the dose-response relationship between the concentration of BK-hex, -DCM, and -wat extracts (a); BK-MeOH (b) and inhibitory  $\alpha$ -glucosidase percentage (\*\* $p$  = 0.003; \*\*\*\* $p$  < 0.0001 against inhibition at 3  $\mu\text{g/mL}$ ,  $n$  = 3, ANOVA)

**Table S8.** Percentage of  $\alpha$ -glucosidase inhibition (%) of acarbose

| No | Sample   | Percentage of inhibition (%) at the indicated concentration ( $\mu\text{g/mL}$ ) |                     |                     |                     |                     |                     | IC <sub>50</sub><br>( $\mu\text{g/mL}$ ) |
|----|----------|----------------------------------------------------------------------------------|---------------------|---------------------|---------------------|---------------------|---------------------|------------------------------------------|
|    |          | 31.25                                                                            | 62.5                | 125                 | 250                 | 500                 | 1000                |                                          |
| 1  | Acarbose | 16.62 $\pm$<br>3.95                                                              | 23.06 $\pm$<br>3.99 | 35.20 $\pm$<br>2.41 | 47.16 $\pm$<br>2.18 | 59.39 $\pm$<br>1.37 | 70.64 $\pm$<br>1.38 | 254 $\pm$<br>22.18                       |

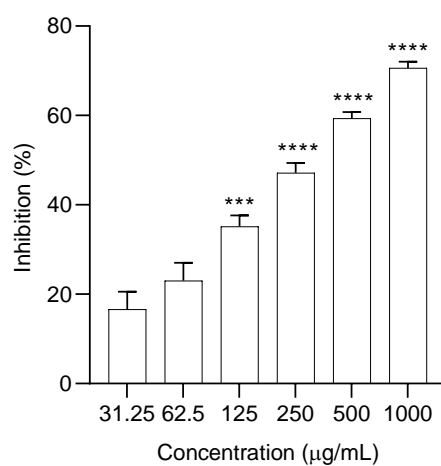

**Figure S5.** Bar charts representing the dose-response relationship between acarbose concentration and inhibitory  $\alpha$ -glucosidase percentage (\*\* $p = 0.0006$ ; \*\*\*\* $p < 0.0001$  against inhibition at 31.25  $\mu\text{g/mL}$ ,  $n = 3$ , ANOVA)

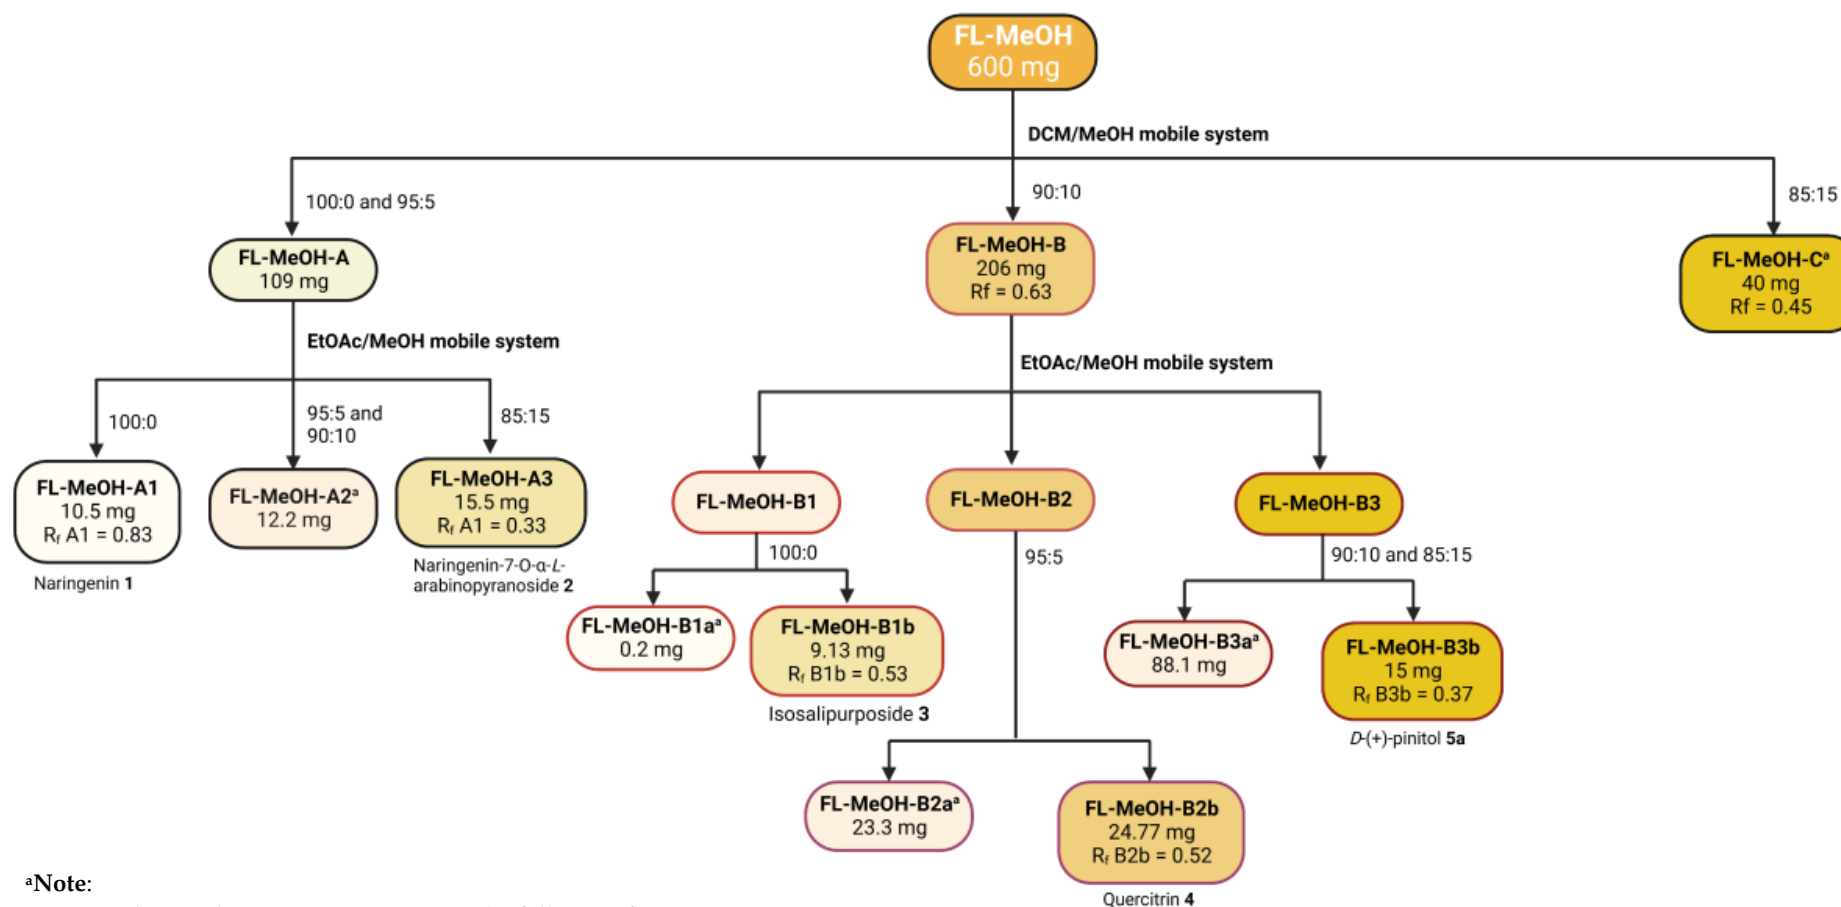

<sup>a</sup>Note:

According to the proton NMR spectra, the following fractions were:

- 1) FL-MeOH-A2 = mixture of subfraction A1 and A3
- 2) FL-MeOH-B1a = mixture of hydrocarbons ( $\delta$   $^1\text{H}$  = 0–1.8 ppm)
- 3) FL-MeOH-B2a = impure subfraction B2b
- 4) FL-MeOH-B3a = impure subfraction B3b
- 5) FL-MeOH-C = impure fraction B

**Figure S6.** Schematic representation of the outcomes of fractionation of FL-MeOH extract of *A. saligna*



**Table S9.** <sup>1</sup>H NMR (400 MHz, CD<sub>3</sub>OD) and <sup>13</sup>C NMR (100 MHz, CD<sub>3</sub>OD) of isolate FL-MeOH-A1 compared to reported naringenin 1

| Atoms | FL-MeOH-A1                                     |                         | Naringenin 1 <sup>a</sup>                      |                         |
|-------|------------------------------------------------|-------------------------|------------------------------------------------|-------------------------|
|       | δ <sup>1</sup> H in ppm (m, J Hz, integration) | δ <sup>13</sup> C (ppm) | δ <sup>1</sup> H in ppm (m, J Hz, integration) | δ <sup>13</sup> C (ppm) |
| 2     | 5.26 (dd; 12.92, 2.9; 1H)                      | 80.63                   | 5.34 (dd; 13, 3; 1H)                           | 80.5                    |
| 3a    | 3.03 (dd; 17.12, 12.92; 1H)                    | 44.2                    | 3.1 (dd; 17, 13; 1H)                           | 44                      |
| 3b    | 2.62 (dd; 17.04, 3.06; 1H)                     |                         | 2.7 (dd; 17, 3; 1H)                            |                         |
| 4     | -                                              | 197.93                  | -                                              | 197.8                   |
| 5     | -                                              | 165.62                  | -                                              | 165.5                   |
| 6     | 5.81 (d; 2.16; 1H)                             | 97.19                   | 5.88 (d; 2; 1H)                                | 97.1                    |
| 7     | -                                              | 168.5                   | -                                              | 168.4                   |
| 8     | 5.82 (d; 2.16; 1H)                             | 96.31                   | 5.9 (d; 2; 1H)                                 | 96.2                    |
| 9     | -                                              | 165.04                  | -                                              | 164.9                   |
| 10    | -                                              | 103.5                   | -                                              | 103.4                   |
| 1'    | -                                              | 131.22                  | -                                              | 131.1                   |
| 2'    | 7.23 (dd; 6.76, 1.78; 1H)                      | 129.18                  | 7.31 (m; 1H)                                   | 129                     |
| 3'    | 6.74 (dd; 6.64, 2.02; 1H)                      | 116.47                  | 6.82 (m; 1H)                                   | 116.4                   |
| 4'    | -                                              | 159.18                  | -                                              | 159                     |
| 5'    | 6.74 (dd; 6.64, 2.02; 1H)                      | 116.47                  | 6.82 (m; 1H)                                   | 116.4                   |
| 6'    | 7.23 (dd; 6.76, 1.78; 1H)                      | 129.18                  | 7.31 (m; 1H)                                   | 129                     |

<sup>a</sup>Du, Q., Jerz, G.; Winterhalter, P., Preparation of three flavonoids from the bark of *Salix alba* by high-speed countercurrent chromatographic separation. *Journal of liquid chromatography & related technologies* **2004**, 27, 3257-3264.

**Table S10.** <sup>1</sup>H NMR (400 MHz, CD<sub>3</sub>OD) and <sup>13</sup>C NMR (100 MHz, CD<sub>3</sub>OD) of FL-MeOH-B1b compared to reported isosalipurposide 3

| Atoms | FL-MeOH-B1b                                    |                         | Isosalipurposide 3 <sup>a</sup>                |                         |
|-------|------------------------------------------------|-------------------------|------------------------------------------------|-------------------------|
|       | δ <sup>1</sup> H in ppm (m, J Hz, integration) | δ <sup>13</sup> C (ppm) | δ <sup>1</sup> H in ppm (m, J Hz, integration) | δ <sup>13</sup> C (ppm) |
| 1     | -                                              | 128.47                  | -                                              | 128.3                   |
| 2     | 7.61 (d; 8.64; 1H)                             | 131.74                  | 7.62 (d; 8.0; 1H)                              | 131.8                   |
| 3     | 6.85 (d; 8.72; 1H)                             | 116.85                  | 6.87 (d; 8.0; 1H))                             | 116.9                   |
| 4     | -                                              | 161.01                  | -                                              | 161.8                   |
| 5     | 6.85 (d; 8.72; 1H)                             | 116.85                  | 6.87 (d; 8.0; 1H)                              | 132.2                   |
| 6     | 7.61 (d; 8.64; 1H)                             | 131.74                  | 7.62 (d; 8.0; 1H)                              | 116.9                   |
| α     | 8.01 (d; 15.52; 1H)                            | 125.88                  | 8.02 (d; 15.0; 1H)                             | 144.2                   |
| β     | 7.69 (d; 15.56; 1H)                            | 144.12                  | 7.68 (d; 15.0; 1H)                             | 125.8                   |
| C=O   | -                                              | 194.44                  | -                                              | 194.8                   |
| 1'    | -                                              | 107.46                  | -                                              | 107.8                   |
| 2'    | -                                              | 165.77                  | -                                              | 165.9                   |
| 3'    | 6.18 (d; 2.24; 1H)                             | 95.63                   | 6.26 (s; 1H)                                   | 95.9                    |
| 4'    | -                                              | 161.75                  | -                                              | 161.1                   |
| 5'    | 6.02 (d; 2.28; 1H)                             | 98.35                   | 6.03 (s; 1H)                                   | 98.5                    |
| 6'    | -                                              | 167.70                  | -                                              | 161.4                   |
| 1''   | 5.09 (d; 7.4; 1H)                              | 101.82                  | 5.15 (d; 7.8; 1H)                              | 101.9                   |
| 2''   | 3.44 (t; 8.75; 1H)                             | 74.97                   | 3.39–3.46 (m; 1H)                              | 75.3                    |
| 3''   | 3.37 (t; 8.25; 1H)                             | 78.45                   | 3.60 (dd; 10.5, 7.5; 1H)                       | 76.3                    |

| Atoms | FL-MeOH-B1b                                           |                                | Isosalipurposide 3 <sup>a</sup>                       |                                |
|-------|-------------------------------------------------------|--------------------------------|-------------------------------------------------------|--------------------------------|
|       | $\delta$ <sup>1</sup> H in ppm (m, J Hz, integration) | $\delta$ <sup>13</sup> C (ppm) | $\delta$ <sup>1</sup> H in ppm (m, J Hz, integration) | $\delta$ <sup>13</sup> C (ppm) |
| 4''   | 3.47 (d; 7.5; 1H)                                     | 71.10                          | 3.47–3.50 (m; 1H)                                     | 72.1                           |
| 5''   | 3.39 (m; 1H)                                          | 78.41                          | 3.54–3.57 (m; 1H)                                     | 76.7                           |
| 6'' a | 3.47 (dd; 12, 5.32; 1H)                               | 62.34                          | 3.76 (dd; 12.6, 1.5; 1H)                              | 62.3                           |
| 6'' b | 3.99 (dd; 11.36, 5.28; 1H)                            | 62.34                          | 3.94 (dd; 12.6, 1.5; 1H)                              | 62.3                           |

<sup>a</sup>Hendra, R., Willis, A.; Keller, P.A., Phytochemical studies on the Australian native plant species *Acacia pycnantha* and *Jacaranda mimosifolia* D. Don.. *Natural product research* **2019**, 33, 1997-2003

**Table S11.** <sup>1</sup>H NMR (400 MHz, CD<sub>3</sub>OD) and <sup>13</sup>C NMR (100 MHz, CD<sub>3</sub>OD) of FL-MeOH-B2b compared to reported quercitrin 4

| Atoms | FL-MeOH-B2b                                        |                                | Quercitrin 4 <sup>a</sup>                          |                                |
|-------|----------------------------------------------------|--------------------------------|----------------------------------------------------|--------------------------------|
|       | $\delta$ <sup>1</sup> H ppm (m, J Hz, integration) | $\delta$ <sup>13</sup> C (ppm) | $\delta$ <sup>1</sup> H ppm (m, J Hz, integration) | $\delta$ <sup>13</sup> C (ppm) |
| 2     | -                                                  | 146.57                         | -                                                  | 149.9                          |
| 3     | -                                                  | 136.38                         | -                                                  | 136.2                          |
| 4     | -                                                  | 179.80                         | -                                                  | 179.6                          |
| 5     | -                                                  | 158.68                         | -                                                  | 163.2                          |
| 6     | 6.21 (d; 2.12; 1H)                                 | 99.95                          | 6.13 (d; 2.5; 1H)                                  | 100.2                          |
| 7     | -                                                  | 166.01                         | -                                                  | 167.2                          |
| 8     | 6.38 (d; 2.08; 1H)                                 | 94.85                          | 6.29 (d; 2.5; 1H)                                  | 95.3                           |
| 9     | -                                                  | 163.37                         | -                                                  | 158.6                          |
| 10    | -                                                  | 106.05                         | -                                                  | 105.6                          |
| 1'    | -                                                  | 123.12                         | -                                                  | 123.1                          |
| 2'    | 7.35 (s; 1H)                                       | 117.07                         | 7.28 (s; 1H)                                       | 116.9                          |
| 3'    | -                                                  | 149.95                         | -                                                  | 146.4                          |
| 4'    | -                                                  | 159.46                         | -                                                  | 159.2                          |
| 5'    | 6.92 (d; 8.28; 1H)                                 | 116.51                         | 6.86 (d; 7.9; 1H)                                  | 116.4                          |
| 6'    | 7.32 (dd; 8.28, 2.14; 1H)                          | 123.01                         | 7.25 (d; 7.9; 1H)                                  | 122.8                          |
| 1''   | 5.36 (d; 1.48; 1H)                                 | 103.69                         | 5.29 (d; 1.2; 1H)                                  | 103.5                          |
| 2''   | 4.23 (dd; 3.28, 1.68; 1H)                          | 72.05                          | 4.17 (m; 1H)                                       | 71.9                           |
| 3''   | 3.76 (dd; 9.36, 3.44; 1H)                          | 72.26                          | 3.70 (d; 6.7; 1H)                                  | 72.2                           |
| 4''   | 3.36 (t; 9.44; 1H)                                 | 73.40                          | 3.32 (d; 9.6; 1H)                                  | 73.4                           |
| 5''   | 3.42 (d; 6.12; 1H)                                 | 72.18                          | 3.35 (m; 1H)                                       | 72                             |
| 6''   | 0.95 (d; 6.08; 3H)                                 | 17.80                          | 0.86 (d; 6.1; 3H)                                  | 17.7                           |

<sup>a</sup>Kim, Y.-K., et al., Isolation of flavonol rhamnosides from *Loranthus tanakae* and cytotoxic effect of them on human tumor cell lines. *Archives of pharmacol research* **2004**, 27, 44-47.

**Table S12.**  $^1\text{H}$  NMR (400 MHz,  $\text{D}_2\text{O}$ ) and  $^{13}\text{C}$  NMR (100 MHz,  $\text{D}_2\text{O}$ ) of isolate FL-MeOH-B3b compared to reported 3-*O*-methyl-*D*-chiro-inositol (*D*-pinitol) **5a**

| Atoms      | FL-MeOH-B3b                                                |                                | <i>D</i> -pinitol <b>5a</b> <sup>a,b</sup>                 |                                |
|------------|------------------------------------------------------------|--------------------------------|------------------------------------------------------------|--------------------------------|
|            | $\delta$ $^1\text{H}$ in ppm (m, <i>J</i> Hz, integration) | $\delta$ $^{13}\text{C}$ (ppm) | $\delta$ $^1\text{H}$ in ppm (m, <i>J</i> Hz, integration) | $\delta$ $^{13}\text{C}$ (ppm) |
| <b>1,6</b> | 3.87 (m; 6.08, 2.08; 2H)                                   | 71.62, 71.42                   | 3.85 (m; 2H)                                               | 71.89, 71.67                   |
| <b>2</b>   | 3.68 (dd; 9.96, 2.86; 1H)                                  | 69.78                          | 3.66 (dd; 9.90, 2.60; 1H)                                  | 70.02                          |
| <b>3</b>   | 3.21 (t; 9.64; 1H)                                         | 82.73                          | 3.19 (t; 9.72; 1H)                                         | 82.96                          |
| <b>4</b>   | 3.51 (t; 9.56; 1H)                                         | 72.08                          | 3.50 (t; 9.76; 1H)                                         | 72.32                          |
| <b>5</b>   | 3.62 (dd; 9.96, 2.86; 1H)                                  | 70.49                          | 3.61 (dd; 9.98, 2.60; 1H)                                  | 70.73                          |
| <b>7</b>   | 3.63 (s; 3H)                                               | 59.68                          | 3.45 (s; 3H)                                               | 59.88                          |

<sup>a</sup>Raya-Gonzalez, D., et al., *D*-(+)-pinitol, a component of the heartwood of *Enterolobium cyclocarpum* (Jacq.). Griseb. *Zeitschrift für Naturforschung* 2008, 63, 922-924.

<sup>b</sup>Anderson, A. B., MacDonald, D.; Fischer, H.O., The structure of pinitol. *J. Am. Chem. Soc.* 1952, 74, 1479-1480

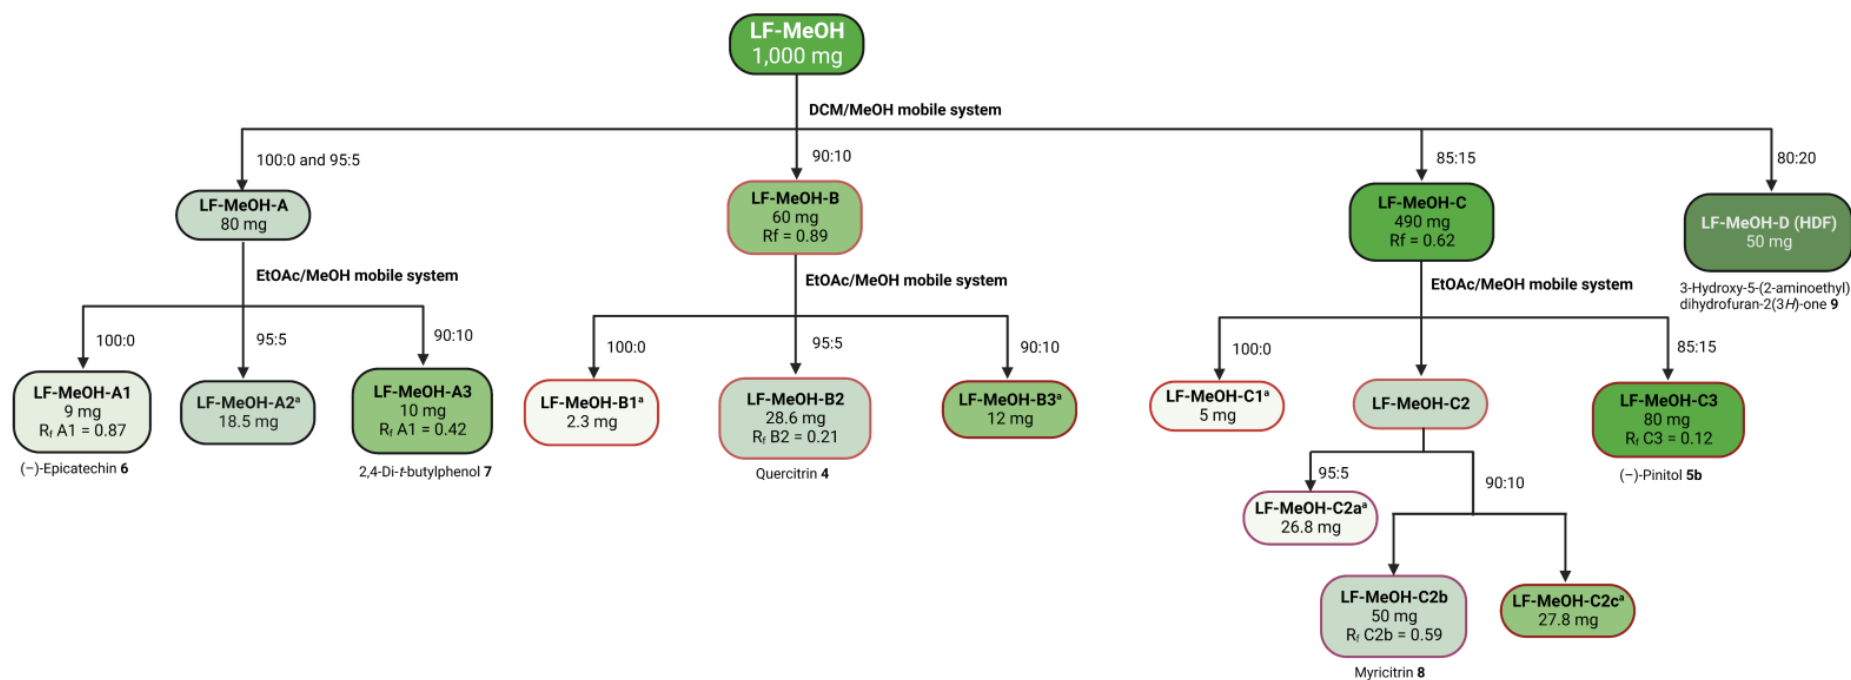

<sup>a</sup>Note:

According to the proton NMR spectra, the following fractions were:

- 1) LF-MeOH-A2 = mixture of subfraction A1 and A3
- 2) LF-MeOH-B1 = mixture of hydrocarbons ( $\delta$  <sup>1</sup>H = 0–1.8 ppm)
- 3) LF-MeOH-B3 = impure subfraction B2
- 4) LF-MeOH-C1 = mixture of hydrocarbons ( $\delta$  <sup>1</sup>H = 0–1.8 ppm)
- 5) LF-MeOH-C2a = impure subfraction C2b
- 6) LF-MeOH-C2c = mixture of subfraction C2b and C3

**Figure S7.** Schematic representation of the outcomes of fractionation of LF-MeOH extract of *A. saligna*

**Table S13.** <sup>1</sup>H NMR (400 MHz) and <sup>13</sup>C NMR (100 MHz) of epicatechin in CD<sub>3</sub>OD isolated from LF-MeOH-A1 extract compared to reference (–)-epicatechin **6**

| Atoms     | LF-MeOH-A1                                        |                         | (–)-Epicatechin <b>6</b> <sup>a</sup>             |                         |
|-----------|---------------------------------------------------|-------------------------|---------------------------------------------------|-------------------------|
|           | δ <sup>1</sup> H in ppm (m, J in Hz, integration) | δ <sup>13</sup> C (ppm) | δ <sup>1</sup> H in ppm (m, J in Hz, integration) | δ <sup>13</sup> C (ppm) |
| <b>2</b>  | 4.58 (d; 7.52; 1H)                                | 81.47                   | 4.82 (br s; 1H)                                   | 79.88                   |
| <b>3</b>  | 3.99 (m; 1H)                                      | 67.42                   | 4.19 (m; 1H)                                      | 67.49                   |
| <b>4a</b> | 2.52 (dd; 16.08, 8.2; 1H)                         | 27.13                   | 2.73 (dd; 16.8, 2.9; 1H)                          | 29.26                   |
| <b>4b</b> | 2.87 (dd; 16.12, 5.4; 1H)                         |                         | 2.87 (dd; 16.8, 4.5; 1H)                          |                         |
| <b>5</b>  | -                                                 | 156.40                  | -                                                 | 158                     |
| <b>6</b>  | 5.95 (d; 2.2; 1H)                                 | 94.88                   | 5.94 (d; 2.3; 1H)                                 | 96.38                   |
| <b>7</b>  | -                                                 | 156.45                  | -                                                 | 157.67                  |
| <b>8</b>  | 5.87 (d; 2.2; 1H)                                 | 94.1                    | 5.97 (d; 2.3; 1H)                                 | 95.88                   |
| <b>9</b>  | -                                                 | 155.53                  | -                                                 | 157.37                  |
| <b>10</b> | -                                                 | 99.41                   | -                                                 | 100.06                  |
| <b>1'</b> | -                                                 | 130.82                  | -                                                 | 132.28                  |
| <b>2'</b> | 6.86 (d; 1.6; 1H)                                 | 113.86                  | 6.98 (d; 1.9; 1H)                                 | 115.32                  |
| <b>3'</b> | -                                                 | 144.84                  | -                                                 | 145.78                  |
| <b>4'</b> | -                                                 | 144.86                  | -                                                 | 145.95                  |
| <b>5'</b> | 6.78 (d; 8.08; 1H)                                | 114.67                  | 6.76 (d; 8.4; 1H)                                 | 115.88                  |
| <b>6'</b> | 6.74 (dd; 8.16, 1.88; 1H)                         | 118.64                  | 6.81 (dd; 8.4, 1.9; 1H)                           | 119.39                  |

<sup>a</sup>Kim, H. J., et al., A new epicatechin gallate and calpain inhibitory activity from *Orostachys japonicus*. *Fitoterapia* **2009**, *80*, 73-76.

**Table S14.** <sup>1</sup>H NMR (400 MHz) and <sup>13</sup>C NMR (100 MHz) of LF-MeOH-A3 in CD<sub>3</sub>OD compared to 2,4-di-*t*-butylphenol **47**

| Atoms     | LF-MeOH-A3                                     |                         | 2,4-di- <i>t</i> -butylphenol <b>7</b> <sup>a</sup> |                         |
|-----------|------------------------------------------------|-------------------------|-----------------------------------------------------|-------------------------|
|           | δ <sup>1</sup> H in ppm (m, J Hz, integration) | δ <sup>13</sup> C (ppm) | δ <sup>1</sup> H in ppm (m, J Hz, integration)      | δ <sup>13</sup> C (ppm) |
| <b>1</b>  | -                                              | 154.93                  | -                                                   | 153.38                  |
| <b>2</b>  | -                                              | 136.27                  | -                                                   | 134.77                  |
| <b>3</b>  | 7.24 (d; 2.24; 1H)                             | 124.45                  | 7.24 (d; 2.4; 1H)                                   | 122.91                  |
| <b>4</b>  | -                                              | 142.45                  | -                                                   | 140.96                  |
| <b>5</b>  | 7.02 (dd; 8.32, 2.48; 1H)                      | 124.37                  | 7.02 (dd; 8.2, 2.4; 1H)                             | 122.82                  |
| <b>6</b>  | 6.640 (d; 8.32; 1H)                            | 116.73                  | 6.64 (d; 8.2; 1H)                                   | 115.19                  |
| <b>7</b>  | -                                              | 35.85                   | -                                                   | 34.31                   |
| <b>8</b>  | -                                              | 35.12                   | -                                                   | 33.58                   |
| <b>9</b>  | 1.4 (s; 9H)                                    | 30.23                   | 1.40 (s, 9H)                                        | 28.67                   |
| <b>10</b> | 1.29 (s; 9H)                                   | 32.29                   | 1.29 (s, 9H)                                        | 30.76                   |

<sup>a</sup>Belghit, S., et al., Activity of 2, 4-Di-tert-butylphenol produced by a strain of *Streptomyces mutabilis* isolated from a Saharan soil against *Candida albicans* and other pathogenic fungi. *Journal de mycologie medicale* **2016**, *26*, 160-169.

**Table S15.**  $^1\text{H}$  NMR (400 MHz,  $\text{CD}_3\text{OD}$ ) and  $^{13}\text{C}$  NMR (100 MHz,  $\text{CD}_3\text{OD}$ ) of isolate LF-MeOH-C2b compared to reported myricetin-3-O- $\alpha$ -L-rhamnopyranoside (Myricitrin) 8

| Atoms | LF-MeOH-C2b                                      |                                | Myricitrin 8 <sup>a</sup>                        |                                |
|-------|--------------------------------------------------|--------------------------------|--------------------------------------------------|--------------------------------|
|       | $\delta$ $^1\text{H}$ ppm (m, J Hz, integration) | $\delta$ $^{13}\text{C}$ (ppm) | $\delta$ $^1\text{H}$ ppm (m, J Hz, integration) | $\delta$ $^{13}\text{C}$ (ppm) |
| 2     | -                                                | 159.59                         | -                                                | 159.2                          |
| 3     | -                                                | 136.46                         | -                                                | 136.1                          |
| 4     | -                                                | 179.83                         | -                                                | 179.5                          |
| 5     | -                                                | 163.38                         | -                                                | 163.1                          |
| 6     | 6.21 (d; 2; 1H)                                  | 99.96                          | 6.19 (d; 1.8; 1H)                                | 99.7                           |
| 7     | -                                                | 166.12                         | -                                                | 164.0                          |
| 8     | 6.37 (d; 2; 1H)                                  | 94.83                          | 6.35 (d; 2.3; 1H)                                | 94.6                           |
| 9     | -                                                | 158.61                         | -                                                | 158.4                          |
| 10    | -                                                | 106.00                         | -                                                | 105.6                          |
| 1'    | -                                                | 122.06                         | -                                                | 121.7                          |
| 2'    | 6.96 (s; 2H)                                     | 109.69                         | 6.94 (s; 2H)                                     | 109.6                          |
| 3'    | -                                                | 147.02                         | -                                                | 146.7                          |
| 4'    | -                                                | 137.99                         | -                                                | 137.7                          |
| 5'    | -                                                | 147.02                         | -                                                | 146.7                          |
| 6'    | 6.96 (s; 2H)                                     | 109.69                         | 6.94 (s; 2H)                                     | 109.6                          |
| 1''   | 5.33 (s; 1H)                                     | 103.79                         | 5.30 (d; 1.8; 1H)                                | 103.5                          |
| 2''   | 4.24 (s; 1H)                                     | 72.04                          | 4.21 (dd; 3.2, 1.8; 1H)                          | 71.7                           |
| 3''   | 3.8 (dd; 9.4, 3.48; 1H)                          | 72.27                          | 3.76–3.78 (dd; 9.4, 3.4; 1H)                     | 72.0                           |
| 4''   | 3.37 (t; 9.52; 1H)                               | 73.50                          | 3.31–3.34 (m; 1H)                                | 73.2                           |
| 5''   | 3.53 (dd; 9.66, 6.1; 1H)                         | 72.19                          | 3.48–3.54 (m; 1H)                                | 71.9                           |
| 6''   | 0.97 (d; 6.16; 3H)                               | 17.82                          | 0.94–0.96 (m; 3H)                                | 17.5                           |

<sup>a</sup>Hwang, I. W., Chung, S. K., Isolation and identification of myricitrin, an antioxidant flavonoid, from *Daebong persimmon* peel. *Preventive nutrition and food science* **2018**, 23, 341.

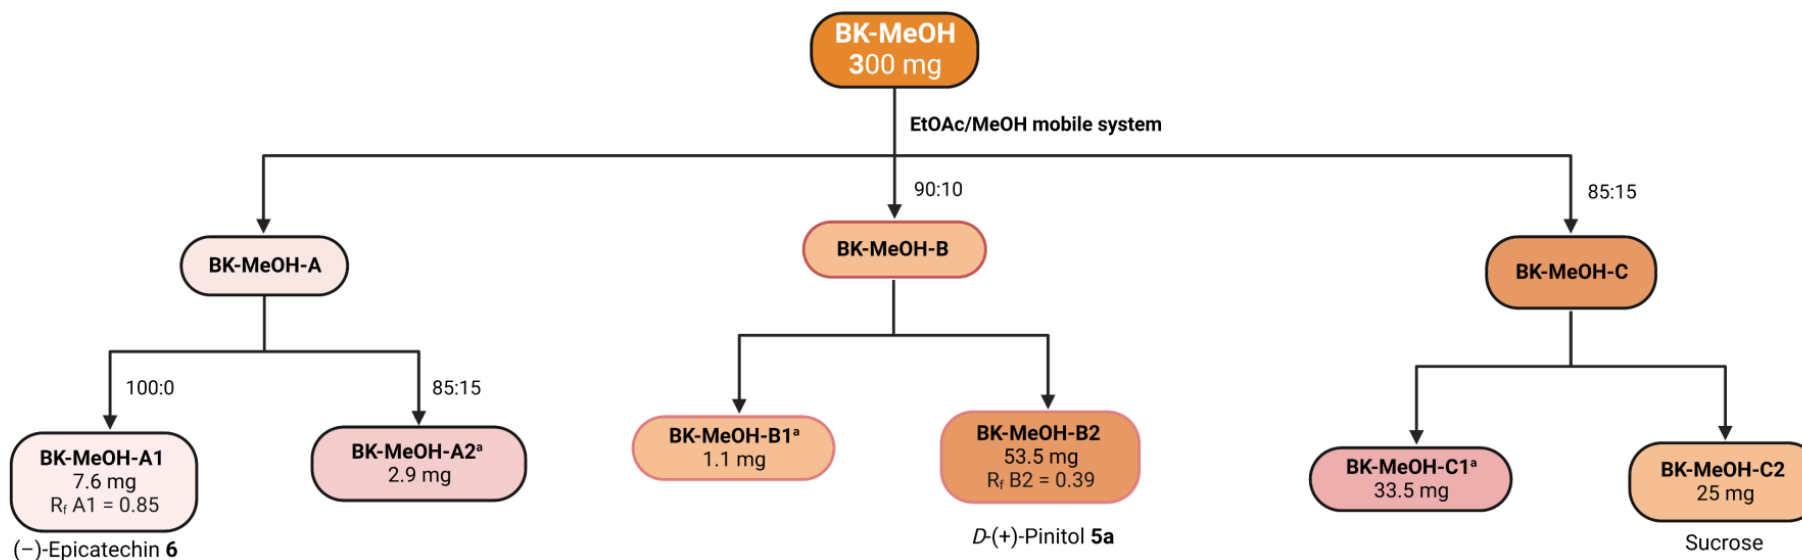

<sup>a</sup>Note:

According to the proton NMR spectra, the following fractions were:

- 1) BK-MeOH-A2 = impure fraction A1
- 2) BK-MeOH-B1 = impure fraction B1
- 3) BK-MeOH-C1 = mixture of B2 and C2

**Figure S8.** Schematic representation of the outcomes of fractionation of BK-MeOH extract of *A. saligna*

**Table S16.**  $^1\text{H}$  NMR (400 MHz,  $\text{D}_2\text{O}$ ) and  $^{13}\text{C}$  NMR (100 MHz,  $\text{D}_2\text{O}$ ) of BK-MeOH-C compared to reported sucrose

| Atoms | BK-MeOH-C                                           |                                | Sucrose <sup>a</sup>                                |                                |
|-------|-----------------------------------------------------|--------------------------------|-----------------------------------------------------|--------------------------------|
|       | $\delta$ $^1\text{H}$ in ppm (m, J Hz, integration) | $\delta$ $^{13}\text{C}$ (ppm) | $\delta$ $^1\text{H}$ in ppm (m, J Hz, integration) | $\delta$ $^{13}\text{C}$ (ppm) |
| 1     | 5.44 (d; 3.84; 1H)                                  | 92.74                          | 5.38 (d; 3.88; 1H)                                  | 94.66                          |
| 2     | 3.58 (dd; 10, 3.84; 1H)                             | 71.63                          | 3.52 (dd; 10, 3.84; 1H)                             | 73.55                          |
| 3     | 3.79 (t; 9.4; 1H)                                   | 73.12                          | 3.72 (t; 9.56; 1H)                                  | 75.05                          |
| 4     | 3.49 (t; 9.46; 1H)                                  | 69.78                          | 3.43 (t; 9.42; 1H)                                  | 71.70                          |
| 5     | 3.89 (m; 1H)                                        | 72.96                          | 3.83 (m; 1H)                                        | 74.88                          |
| 6     | 3.85 (d; 2; 2H)                                     | 62.93                          | 3.78 (d; 2.96; 2H)                                  | 62.59                          |
| 1'    | 3.70 (s; 2H)                                        | 61.91                          | 3.63 (s; 2H)                                        | 63.82                          |
| 2'    | -                                                   | 104.24                         | -                                                   | 106.17                         |
| 3'    | 4.24 (d; 8.76; 1H)                                  | 76.98                          | 4.18 (d; 8.76; 1H)                                  | 78.88                          |
| 4'    | 4.00 (t; 8.54; 1H)                                  | 74.55                          | 4.01 (t; 1H; 8.56)                                  | 76.47                          |
| 5'    | 3.93 (m; 1H)                                        | 81.92                          | 3.86 (m; 1H)                                        | 83.85                          |
| 6'    | 3.84 (s; 2H)                                        | 60.68                          | 3.79 (s; 2H)                                        | 64.84                          |

<sup>a</sup> Hernández-García, E., et al., Nuclear magnetic resonance spectroscopy data of isolated compounds from *Acacia farnesiana* (L.) Willd fruits and two esterified derivatives. *Data in brief*, **2019**, 22, 255-268.



**Table S17.** The DPPH scavenging properties of the isolated compounds

| No | Sample                                                              | Scavenging percentage (%) at the indicated concentration (μM) |              |              |              |              |              |              |              | IC <sub>50</sub> (μM) |
|----|---------------------------------------------------------------------|---------------------------------------------------------------|--------------|--------------|--------------|--------------|--------------|--------------|--------------|-----------------------|
|    |                                                                     | 62.5                                                          | 125          | 250          | 500          | 1,000        | 2,000        | 5,000        | 10,000       |                       |
| 1  | Isosalipurposide <b>3</b>                                           | -                                                             | 15.14 ± 1.24 | 18.65 ± 1.74 | 25.34 ± 0.46 | 37.83 ± 2.00 | 56.78 ± 2.75 | 61.44 ± 2.74 | -            | 1,559 ± 28.16***      |
| 2  | Naringenin <b>1</b>                                                 | -                                                             | -            | 10.06 ± 1.61 | 12.34 ± 1.02 | 14.91 ± 0.56 | 21.46 ± 0.74 | 26.55 ± 3.29 | 34.51 ± 0.39 | >10,000 <sup>a</sup>  |
| 3  | Quercitrin <b>4</b>                                                 | 9.75 ± 0.72                                                   | 18.71 ± 1.82 | 38.91 ± 2.00 | 68.99 ± 1.13 | 86.6 ± 0.39  | 90.5 ± 0.17  | -            | -            | 322.6 ± 14.05***      |
| 4  | Myricitrin <b>8</b>                                                 | 14.44 ± 1.88                                                  | 28.65 ± 0.70 | 57.71 ± 1.33 | 93.77 ± 0.50 | 95.01 ± 0.14 | 95.38 ± 0.17 | -            | -            | 199.9 ± 4.83****      |
| 5  | Naringenin-7-O-α-L-arabinopyranose <b>2</b>                         | -                                                             | -            | 1.62 ± 0.37  | 2.62 ± 1.68  | 3.98 ± 0.47  | 7.35 ± 2.14  | 16.08 ± 5.11 | 19.62 ± 0.53 | >10,000 <sup>a</sup>  |
| 6  | <i>D</i> -(+)-pinitol <b>5a</b>                                     | -                                                             | -            | 8.23 ± 2.52  | 15.77 ± 2.41 | 29.25 ± 3.11 | 58.31 ± 1.55 | 88.25 ± 1.58 | 87.38 ± 0.56 | 1,675 ± 65.72****     |
| 7  | (-)-pinitol <b>5b</b>                                               | -                                                             | -            | 12.39 ± 3.61 | 14.62 ± 1.37 | 20.22 ± 0.16 | 28.10 ± 0.57 | 42.58 ± 1.00 | 59.93 ± 2.21 | 6,865 ± 69.08****     |
| 8  | (-)-Epicatechin <b>6</b>                                            | 14.04 ± 3.44                                                  | 23.44 ± 2.00 | 43.22 ± 1.91 | 65.65 ± 9.73 | 87.84 ± 6.31 | 95.28 ± 0.28 | -            | -            | 278 ± 8.62****        |
| 9  | 2,4-Di- <i>t</i> -butylphenol <b>7</b>                              | -                                                             | -            | 8.00 ± 3.65  | 10.16 ± 3.02 | 12.05 ± 3.42 | 21.75 ± 4.18 | 24.47 ± 3.73 | 36.9 ± 4.20  | >10,000 <sup>a</sup>  |
| 10 | 3-Hydroxy-5-(2-aminoethyl) dihydrofuran-2(3 <i>H</i> )-one <b>9</b> | -                                                             | -            | -6.10        | -3.31        | 0.02 ± 5.07  | 5.78 ± 5.61  | 8.92 ± 4.58  | 14.37 ± 5.29 | >10,000 <sup>a</sup>  |
| 11 | Vitamin C                                                           | 1.86 ± 1.45                                                   | 5.71 ± 2.28  | 6.738 ± 1.43 | 20.65 ± 1.62 | 46.58 ± 2.18 | 87.17 ± 2.15 | -            | -            | 1,072 ± 47.64         |

<sup>a</sup>The activity did not reach 50% at the highest tested concentration (10 mM); \*\**p* = 0.0002, \*\*\*\**p* < 0.0001 were from the IC<sub>50</sub> of the compound *vs* vitamin C (*n* = 3, ANOVA, Tukey).

**Table S18.** The ABTS scavenging properties of the isolated compounds

| No | Sample                                                              | Scavenging percentage (%) at the indicated concentration (μM) |              |              |              |              |              |              |              | IC <sub>50</sub> (μM) |
|----|---------------------------------------------------------------------|---------------------------------------------------------------|--------------|--------------|--------------|--------------|--------------|--------------|--------------|-----------------------|
|    |                                                                     | 62.5                                                          | 125          | 250          | 500          | 1,000        | 2,000        | 5,000        | 10,000       |                       |
| 1  | Isosalipurposide <b>3</b>                                           | -                                                             | -            | 13.98 ± 0.26 | 23.37 ± 1.96 | 36.21 ± 2.37 | 56.01 ± 2.29 | 80.17 ± 1.90 | 93.27 ± 0.45 | 1,686 ± 95.26***      |
| 2  | Naringenin <b>1</b>                                                 | -                                                             | 19.55 ± 1.05 | 26.91 ± 0.12 | 35.88 ± 0.80 | 43.71 ± 0.72 | 55.46 ± 4.06 | 79.89 ± 0.76 | -            | 1,525 ± 316.5***      |
| 3  | Quercitrin <b>4</b>                                                 | 14.01 ± 2.14                                                  | 24.82 ± 0.34 | 37.36 ± 0.73 | 63.06 ± 1.37 | 85.56 ± 1.67 | 99.03 ± 0.06 | -            | -            | 355.3 ± 12.08         |
| 4  | Myricitrin <b>8</b>                                                 | 14.29 ± 4.22                                                  | 29.41 ± 2.13 | 44.56 ± 1.02 | 67.66 ± 1.4  | 82.1 ± 1.07  | 91.98 ± 0.95 | -            | -            | 285.9 ± 7.21          |
| 5  | Naringenin-7O-α-L-arabinopyranose <b>2</b>                          | -                                                             | 15.36 ± 2.00 | 24.98 ± 1.42 | 29.92 ± 1.69 | 34.82 ± 1.07 | 38.65 ± 3.00 | 56.29 ± 1.34 | -            | 4,146 ± 99.15***      |
| 6  | <i>D</i> -(+)-pinitol <b>5a</b>                                     | 6.55 ± 5.32                                                   | 15.61 ± 5.01 | 27.6 ± 4.14  | 50.66 ± 2.31 | 92.43 ± 0.19 | 99.96 ± 0.34 | -            | -            | 475 ± 24.20           |
| 7  | (-)-pinitol <b>5b</b>                                               | -                                                             | 5.87 ± 0.16  | 2.98 ± 0.83  | 18.5 ± 2.05  | 28.61 ± 1.83 | 48.48 ± 1.37 | 82.87 ± 3.41 | -            | 2,096 ± 70.40***      |
| 8  | (-)-Epicatechin <b>6</b>                                            | 35.88 ± 3.58                                                  | 63.17 ± 4.09 | 90.85 ± 2.43 | 99.56 ± 0.04 | 99.67 ± 0.09 | 99.85 ± 0.13 | -            | -            | 92.58 ± 13.03         |
| 9  | 2,4-Di- <i>t</i> -butylphenol <b>7</b>                              | -                                                             | 10.89 ± 1.68 | 11.94 ± 2.44 | 19.29 ± 0.04 | 27.88 ± 1.19 | 41.91 ± 0.25 | 70.9 ± 3.48  | -            | 2,715 ± 64.02***      |
| 10 | 3-Hydroxy-5-(2-aminoethyl) dihydrofuran-2(3 <i>H</i> )-one <b>9</b> | -                                                             | 4.35 ± 4.02  | 8.67 ± 6.85  | 1.68 ± 2.58  | 5.84 ± 1.27  | 10.46 ± 3.85 | 22.49 ± 5.44 | -            | >10,000 <sup>a</sup>  |
| 11 | Vitamin C                                                           | 9.40 ± 1.74                                                   | 13.86 ± 3.70 | 30.4 ± 6.61  | 53.52 ± 4.17 | 80.4 ± 1.65  | 96.39 ± 1.71 | -            | -            | 460.2 ± 56.29         |

<sup>a</sup>The activity did not reach 50% at the highest tested concentration (5 mM). \*\*\* $p < 0.0001$  was from the IC<sub>50</sub> of the compound *vs* vitamin C ( $n = 3$ , ANOVA, Tukey).

**Table S19.** GC analysis of BK-MeOH

| No | Group                            | Compound                                   | Molecular formula                                               | Structure                                                                           |
|----|----------------------------------|--------------------------------------------|-----------------------------------------------------------------|-------------------------------------------------------------------------------------|
| 1  | Unsaturated carboxylic acid      | <i>trans</i> -Cinnamic acid                | C <sub>9</sub> H <sub>8</sub> O <sub>2</sub>                    | 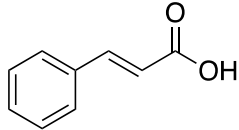 |
| 2  | Polyols                          | 4-C-Methyl- <i>myo</i> -inositol (lamitol) | C <sub>7</sub> H <sub>14</sub> O <sub>6</sub>                   |  |
| 3  | Amino acid (primary metabolites) | <i>D</i> -Asparagine                       | C <sub>4</sub> H <sub>8</sub> N <sub>2</sub> O <sub>3</sub>     |  |
| 4  | Nucleoside                       | Thymidine-5'-monophosphate                 | C <sub>10</sub> H <sub>15</sub> N <sub>2</sub> O <sub>8</sub> P |  |

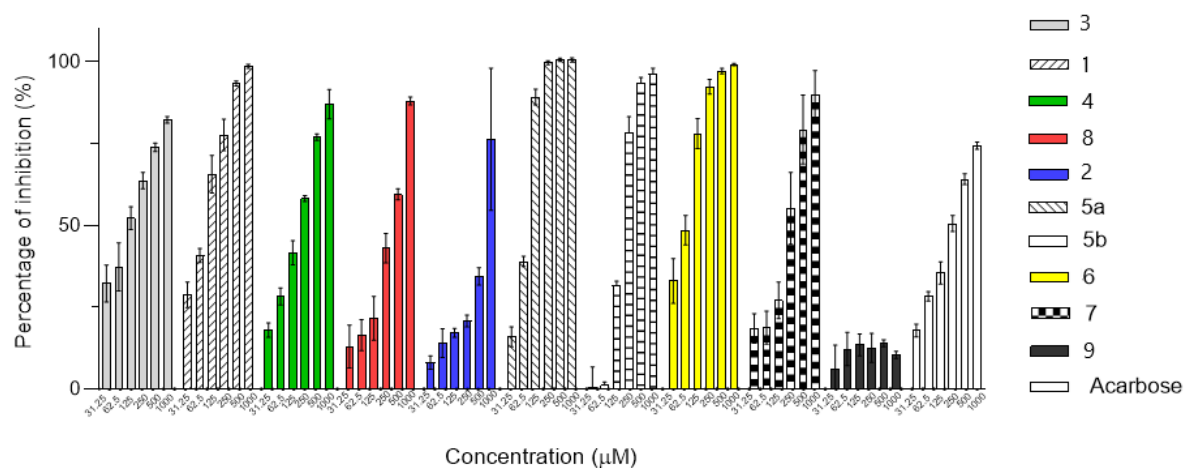

**Fig S9.** Bar graphs representing the inhibitory activity (%) of isolated compounds against the  $\alpha$ -glucosidase enzyme.

Compounds. **3**: isosalipurposide; **1**: naringenin; **4**: quercitrin; **8**: myricitrin; **2**: naringenin-7O- $\alpha$ -L-arabinopyranose; **5a**: *D*-(+)-pinitol, **5b**: (-)-pinitol; **6**: (-)-epicatechin; **7**: 2,4-di-*t*-butylphenol; **9**: 3-hydroxy-5-(2-aminoethyl) dihydrofuran-2(3*H*)-one.

**Table S20.** The quantified inhibitory activity of the isolated compounds against the  $\alpha$ -glucosidase enzyme

| No | Sample                                                              | Inhibitory percentage (%) at the corresponding concentration ( $\mu$ M) |                  |                  |                   |                   |                   | IC <sub>50</sub> ( $\mu$ M) |
|----|---------------------------------------------------------------------|-------------------------------------------------------------------------|------------------|------------------|-------------------|-------------------|-------------------|-----------------------------|
|    |                                                                     | 31.25                                                                   | 62.5             | 125              | 250               | 500               | 1,000             |                             |
| 1  | Isosalipurposide <b>3</b>                                           | 32.27 $\pm$ 5.61                                                        | 37.36 $\pm$ 7.32 | 52.19 $\pm$ 3.49 | 63.69 $\pm$ 2.47  | 73.88 $\pm$ 1.29  | 82.3 $\pm$ 1.00   | 116.5 $\pm$ 26.40           |
| 2  | Naringenin <b>1</b>                                                 | 28.81 $\pm$ 3.89                                                        | 40.78 $\pm$ 2.19 | 65.64 $\pm$ 5.77 | 77.64 $\pm$ 4.81  | 93.37 $\pm$ 0.75  | 98.59 $\pm$ 0.61  | 89.71 $\pm$ 10.22*          |
| 3  | Quercitrin <b>4</b>                                                 | 18.01 $\pm$ 2.18                                                        | 28.32 $\pm$ 2.61 | 41.66 $\pm$ 3.69 | 58.19 $\pm$ 0.84  | 76.97 $\pm$ 0.99  | 87.03 $\pm$ 4.46  | 177.3 $\pm$ 11.34           |
| 4  | Myricitrin <b>8</b>                                                 | 13.01 $\pm$ 6.59                                                        | 16.52 $\pm$ 4.71 | 21.58 $\pm$ 6.71 | 43.06 $\pm$ 4.48  | 59.48 $\pm$ 1.73  | 88.06 $\pm$ 1.19  | 351.6 $\pm$ 24.88           |
| 5  | Naringenin-7O- $\alpha$ -L-arabinopyranose <b>2</b>                 | 8.11 $\pm$ 2.03                                                         | 14.07 $\pm$ 4.44 | 17.2 $\pm$ 1.41  | 20.81 $\pm$ 1.80  | 34.41 $\pm$ 2.66  | 76.34 $\pm$ 21.72 | 769.1 $\pm$ 95.82****       |
| 6  | <i>D</i> -(+)-pinitol <b>5a</b>                                     | 16 $\pm$ 3.03                                                           | 39 $\pm$ 1.59    | 89.22 $\pm$ 2.40 | 99.74 $\pm$ 0.57  | 100.6 $\pm$ 0.54  | 100.5 $\pm$ 0.64  | 74.69 $\pm$ 0.23*           |
| 7  | (-)-pinitol <b>5b</b>                                               | 0.29 $\pm$ 6.45                                                         | 1.18 $\pm$ 0.97  | 31.64 $\pm$ 1.35 | 78.43 $\pm$ 4.73  | 93.46 $\pm$ 1.77  | 96.17 $\pm$ 1.85  | 164.2 $\pm$ 8.36            |
| 8  | (-)-Epicatechin <b>6</b>                                            | 33.01 $\pm$ 6.84                                                        | 48.53 $\pm$ 4.50 | 78.04 $\pm$ 4.6  | 92.36 $\pm$ 2.23  | 97.14 $\pm$ 0.82  | 99.15 $\pm$ 0.38  | 63.58 $\pm$ 11.83*          |
| 9  | 2,4-Di- <i>t</i> -butylphenol <b>7</b>                              | 18.57 $\pm$ 4.45                                                        | 18.73 $\pm$ 5.06 | 27.11 $\pm$ 5.58 | 55.17 $\pm$ 10.98 | 79.26 $\pm$ 10.49 | 89.86 $\pm$ 7.42  | 259 $\pm$ 58.34             |
| 10 | 3-Hydroxy-5-(2-aminoethyl) dihydrofuran-2(3 <i>H</i> )-one <b>9</b> | 5.99 $\pm$ 7.41                                                         | 12.28 $\pm$ 5.13 | 13.5 $\pm$ 3.35  | 12.55 $\pm$ 4.46  | 14.01 $\pm$ 1.03  | 10.47 $\pm$ 1.06  | >1000 <sup>a</sup>          |
| 11 | Acarbose                                                            | 17.88 $\pm$ 1.97                                                        | 28.34 $\pm$ 1.44 | 35.48 $\pm$ 3.47 | 50.6 $\pm$ 2.46   | 64.13 $\pm$ 1.65  | 74.34 $\pm$ 1.09  | 239.9 $\pm$ 31.74           |

<sup>a</sup>The activity did not reach 50% at the highest tested concentration (1 mM); \* $p$  = 0.03; \*\*\*\* $p$  < 0.0001 were from the inhibition of the compound *vs* acarbose ( $n$  = 3, ANOVA, Tukey).
